# Supplementary material for: Synthesis and Structure of 6-Acetyl-2-Arylhydrazone Derivatives of Thiazolo[3,2-a]Pyrimidine
Source: MDPI journal article supplement (doi:10.3390/org4030031), 2023-08-11

Supplementary Materials for:

# Synthesis, Structure and Reduction of 6-Acetyl-2-Arylhydrazine Derivatives of Thiazolo[3,2-*a*]pyrimidine

Artem S. Agarkov <sup>1,\*</sup>, Dilyara O. Mingazhetdinova <sup>2</sup>, Anna A. Nefedova <sup>1</sup>, Alexander S. Ovsyanikov <sup>1</sup>, Andrey K. Shiryayev <sup>3</sup>, Igor A. Litvinov <sup>1</sup>, Svetlana E. Solovieva <sup>1</sup> and Igor S. Antipin <sup>2</sup>

<sup>1</sup> Arbuzov Institute of Organic and Physical Chemistry, FRC Kazan Scientific Center, Russian Academy of Sciences, Arbuzova 8, 420088 Kazan, Russia

<sup>2</sup> Kazan Federal University, A.M. Butlerov Chemical Institute, 18 Kremlevskaya St., 420008 Kazan, Russia

<sup>3</sup> Samara State Technical University, Molodogvardeyskaya 244, Samara 443100 ; Russia

\* Correspondence: [artem.agarkov.95.chem@mail.ru](mailto:artem.agarkov.95.chem@mail.ru)

**Figure S1.** <sup>1</sup>H NMR spectrum of compound **2b** (DMSO-*d*<sub>6</sub>, 400 MHz, 25°C).

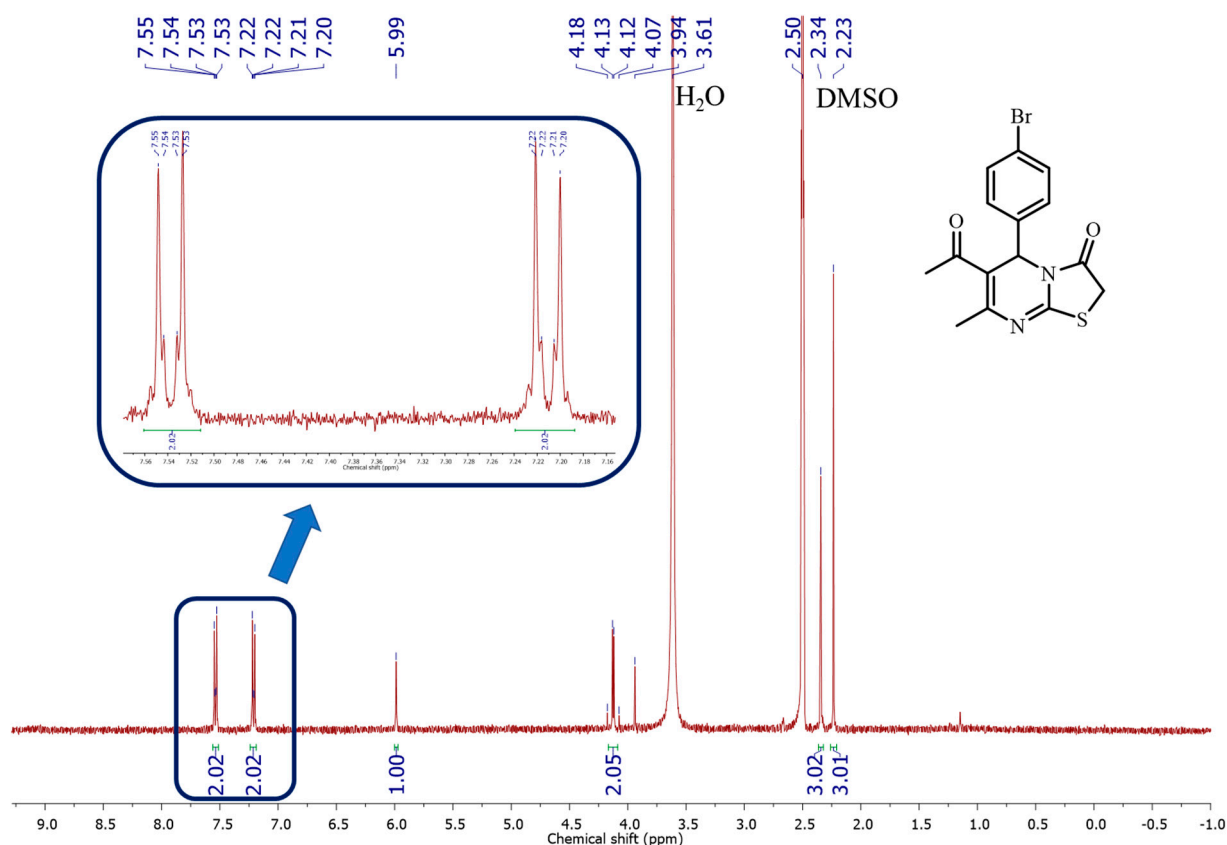

**Figure S2.** <sup>13</sup>C NMR spectrum of compound **2b** (DMSO-*d*<sub>6</sub>, 100 MHz, 25°C).

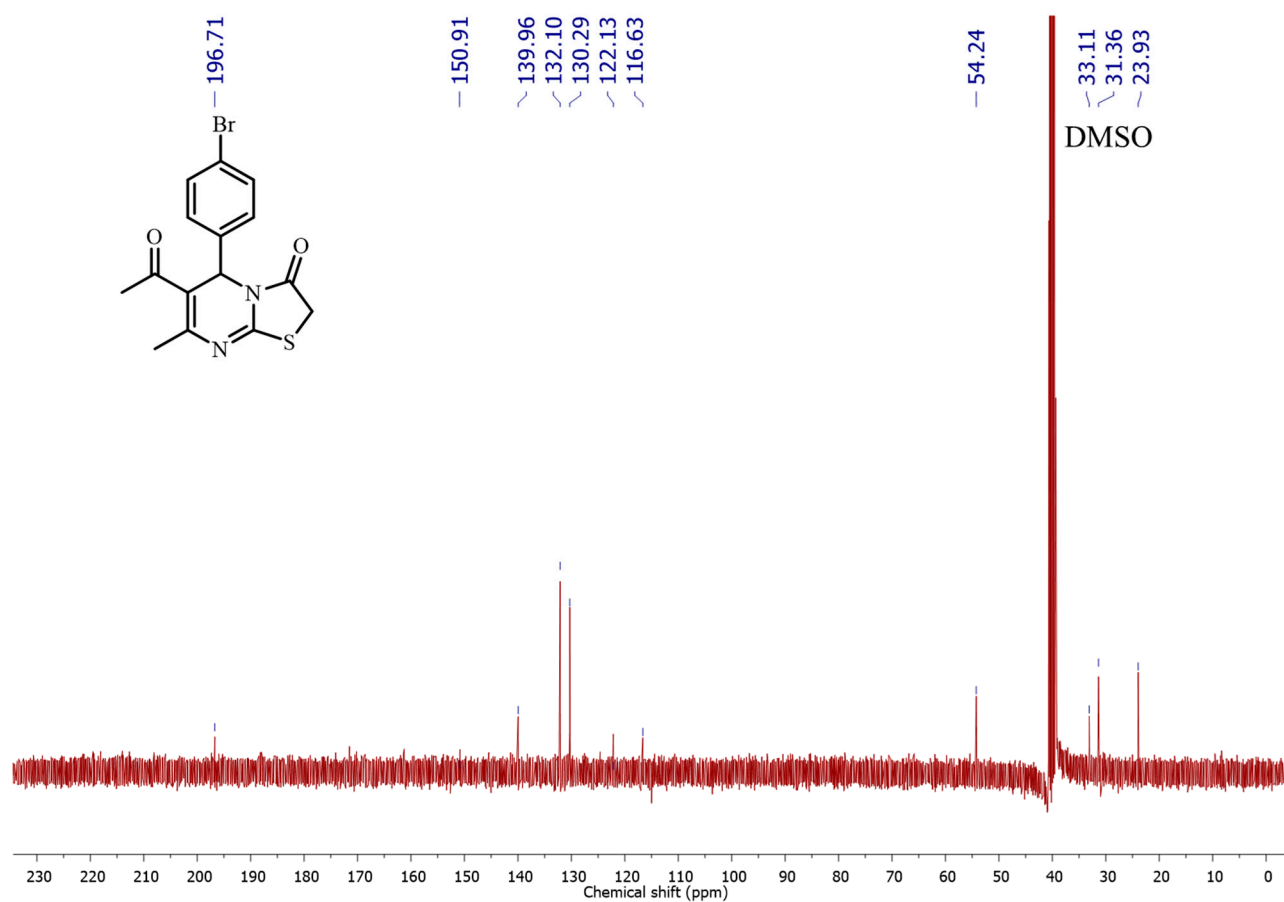Figure S3. IR spectrum of compound **2b** (KBr tablet).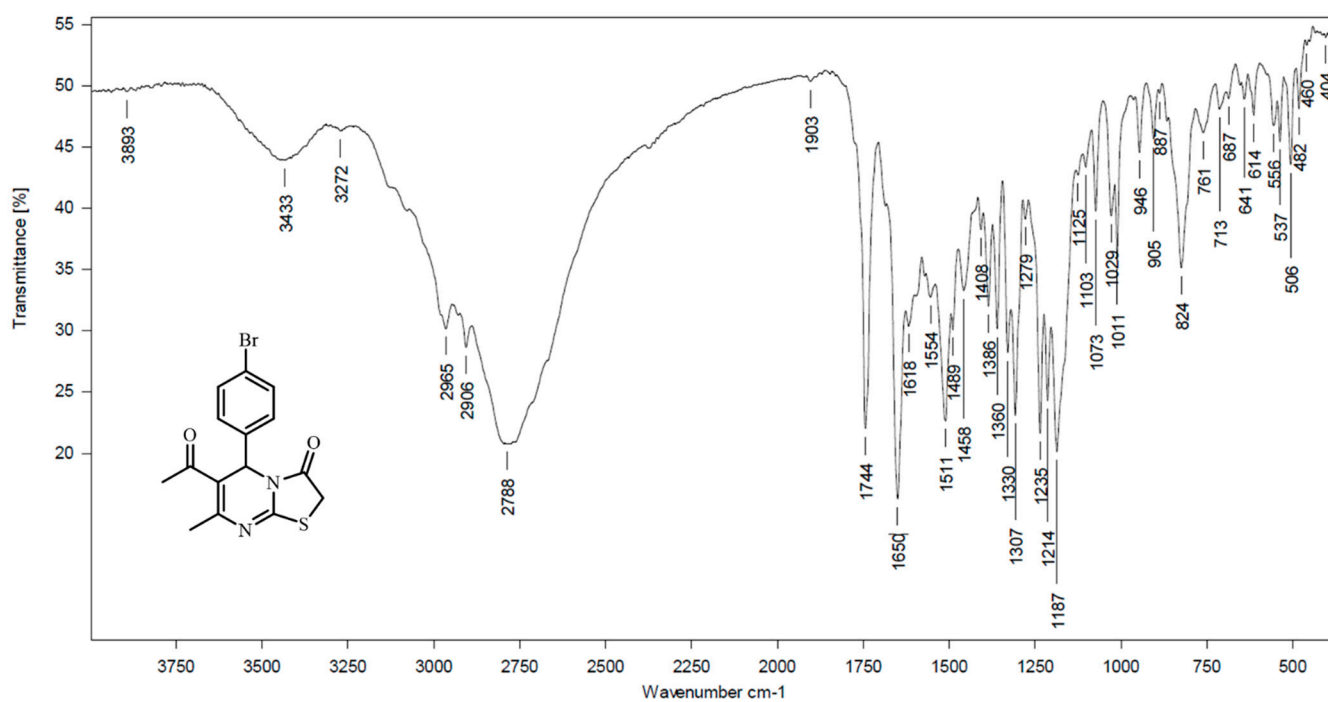Figure S4. <sup>1</sup>H NMR spectrum of compound **3a** (DMSO-d<sub>6</sub>, 400 MHz, 25°C).

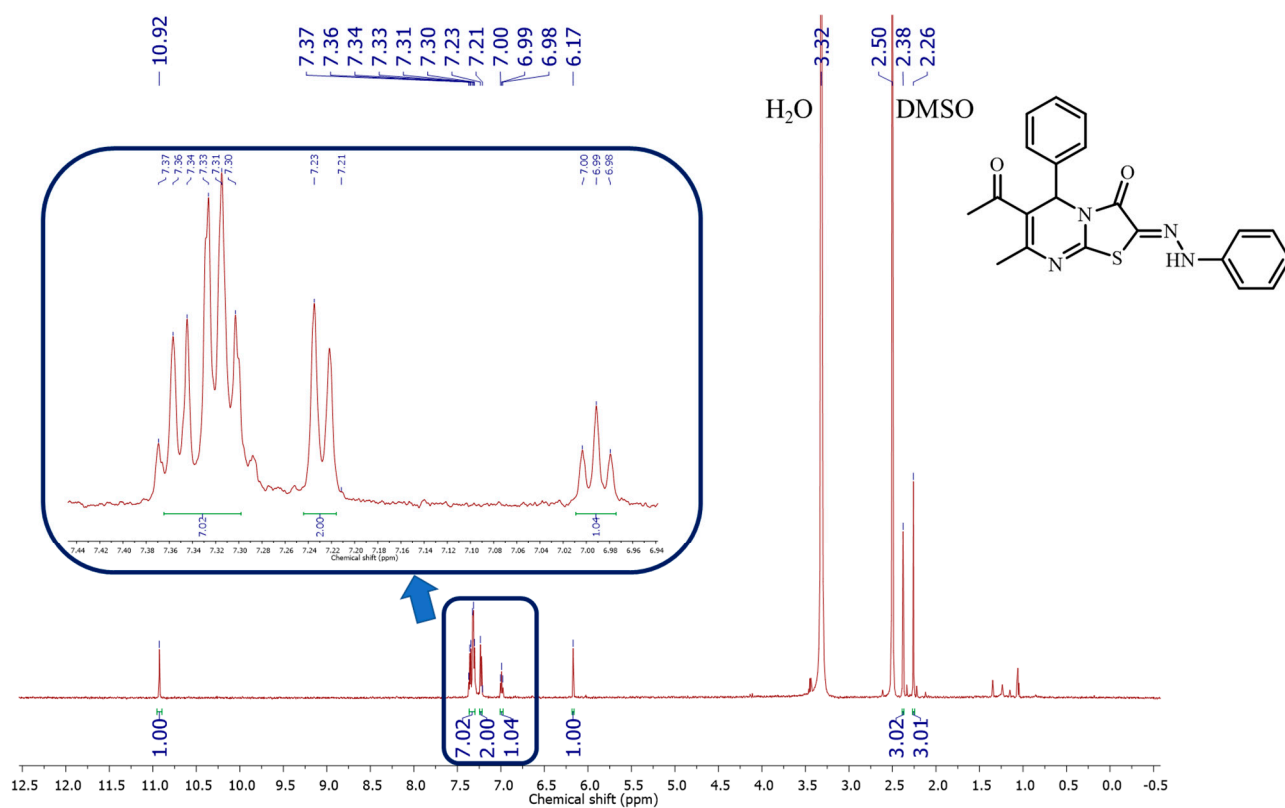

**Figure S5.** <sup>13</sup>C NMR spectrum of compound **3a** (DMSO-d<sub>6</sub>, 100 MHz, 25°C).

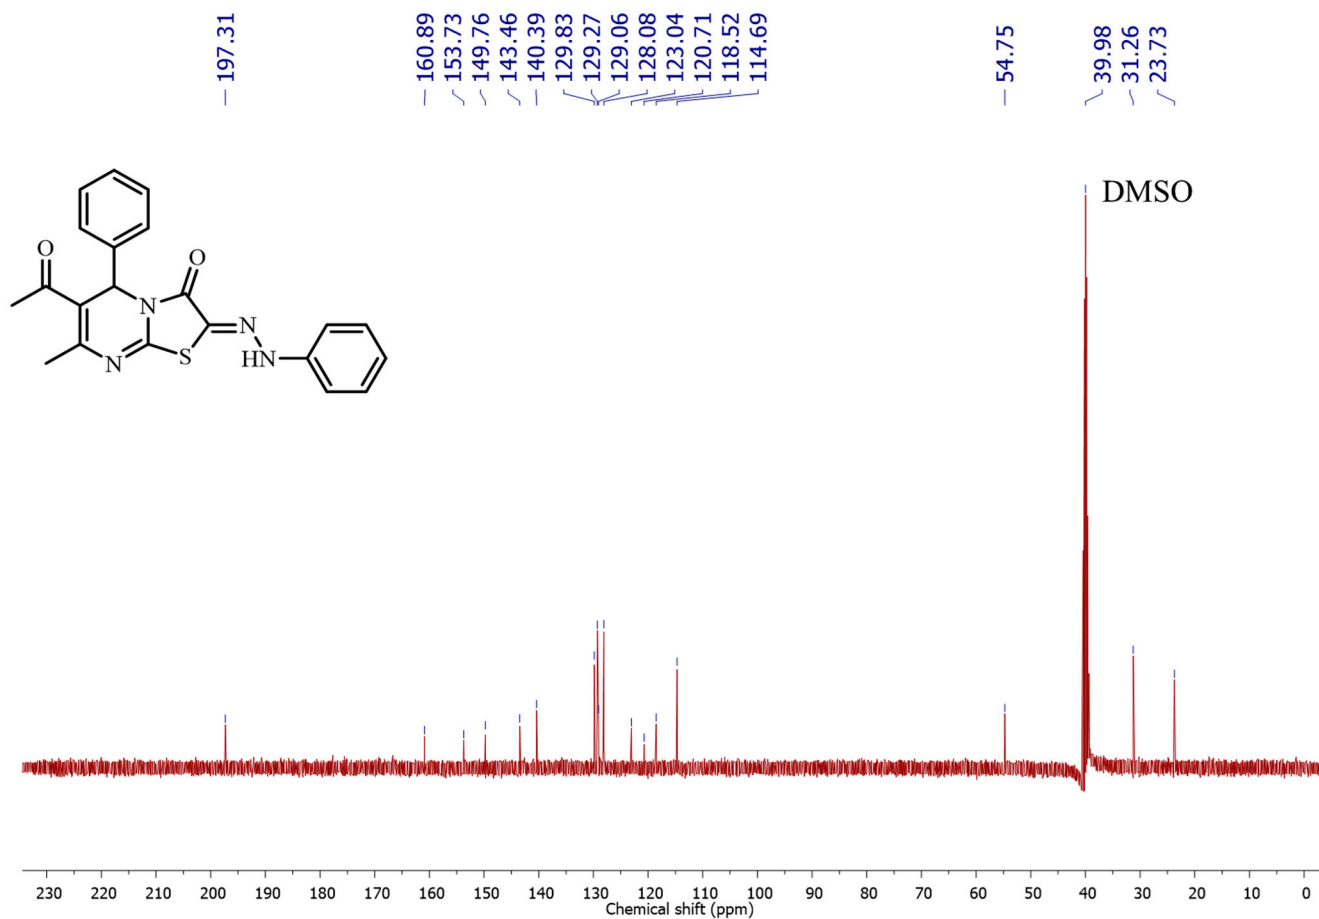

Figure S6. IR spectrum of compound 3a (KBr tablet).

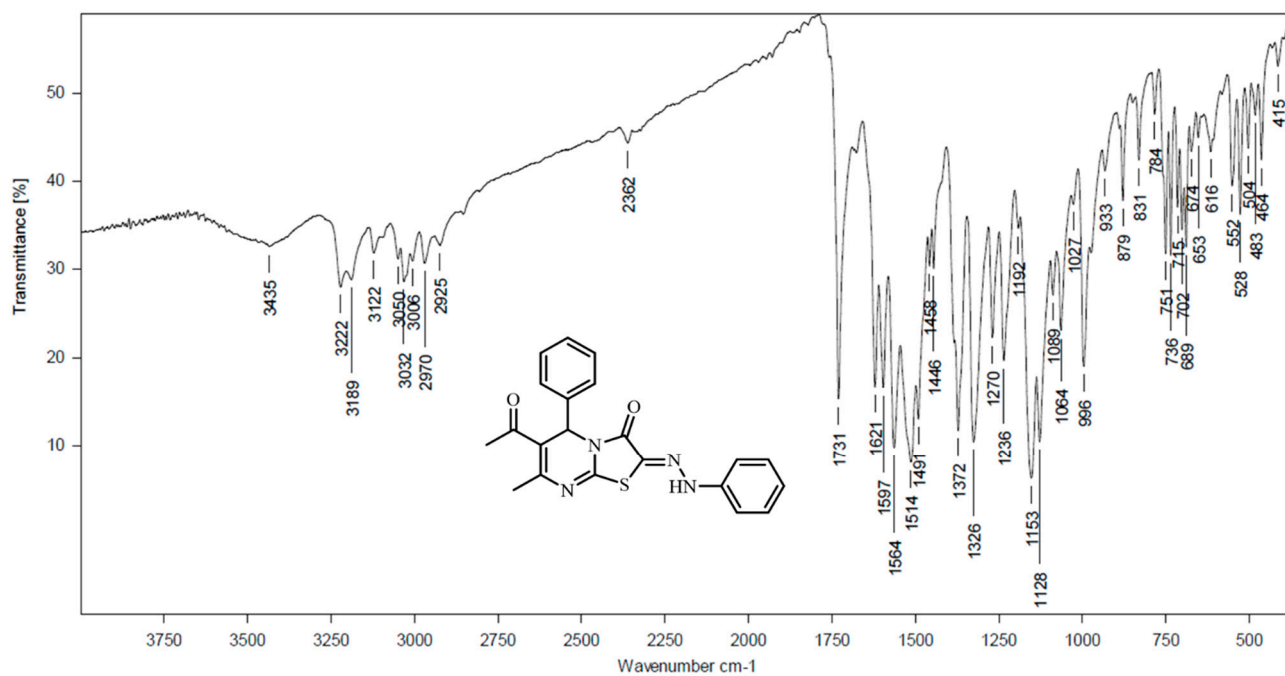

Figure S7. ESI MS spectrum of compound 3a (Ion Polarity: Positive).

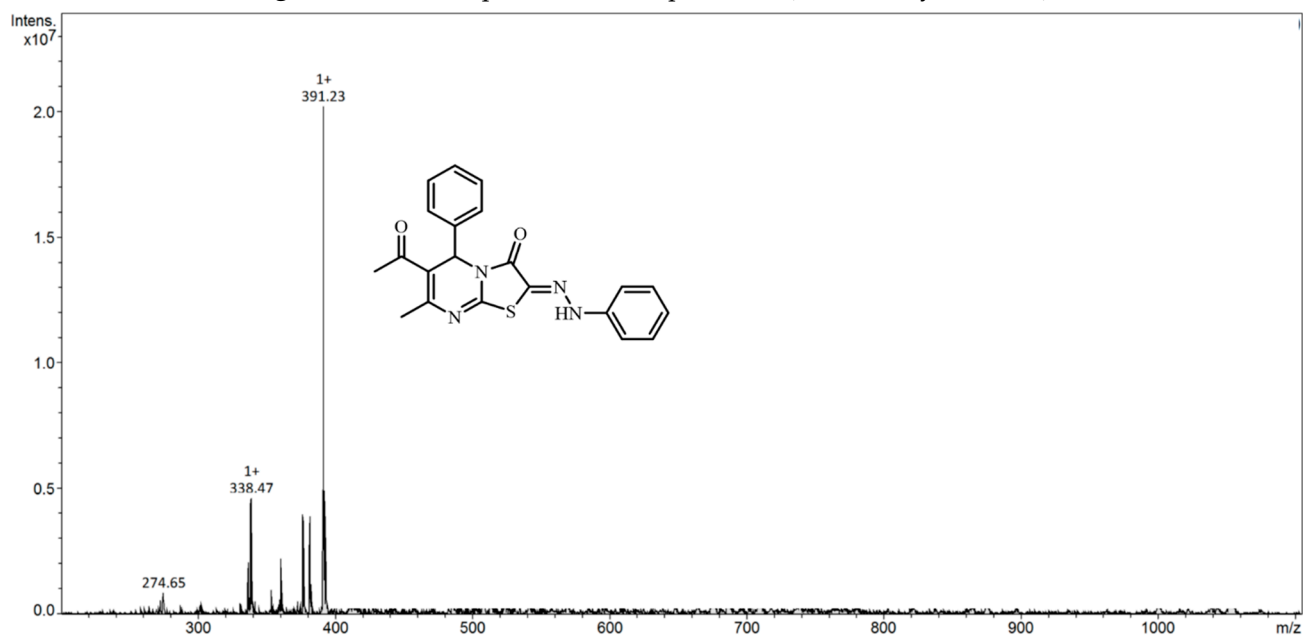

**Figure S8.**  $^1\text{H}$  NMR spectrum of compound **3b** (DMSO- $d_6$ , 400 MHz, 25°C).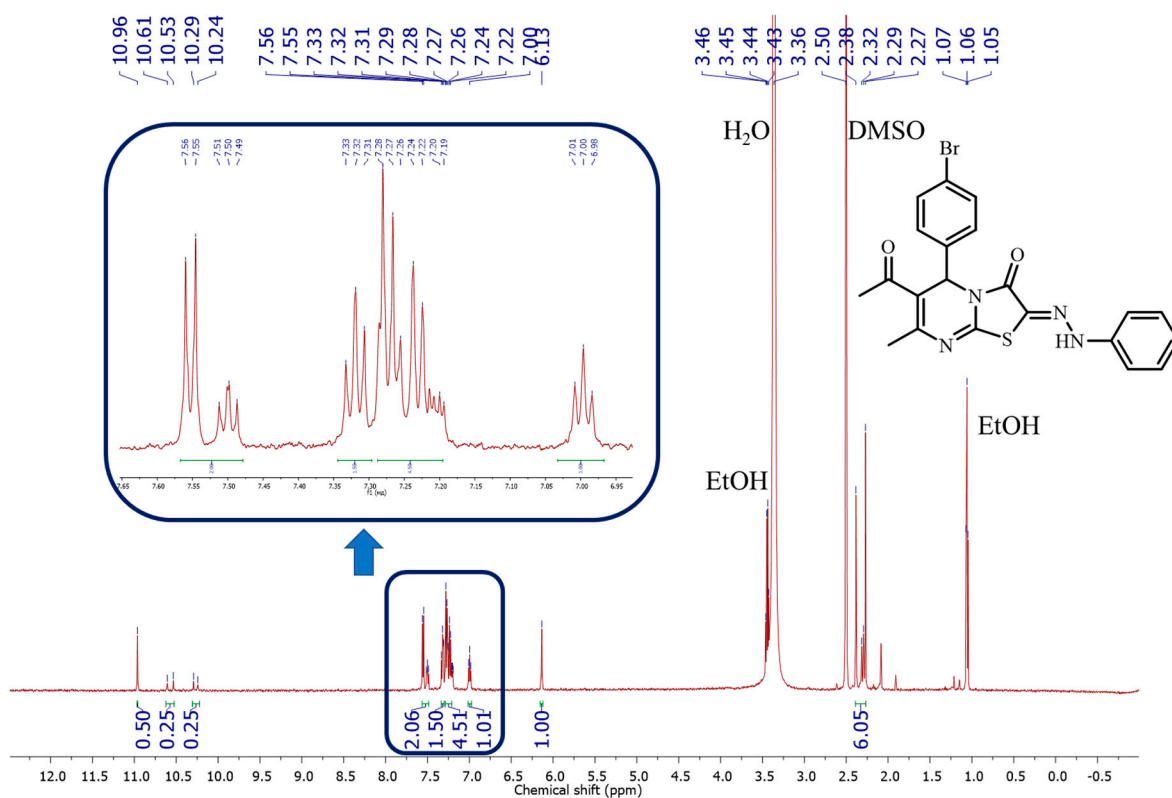**Figure S9.**  $^{13}\text{C}$  NMR spectrum of compound **3b** (DMSO- $d_6$ , 100 MHz, 25°C).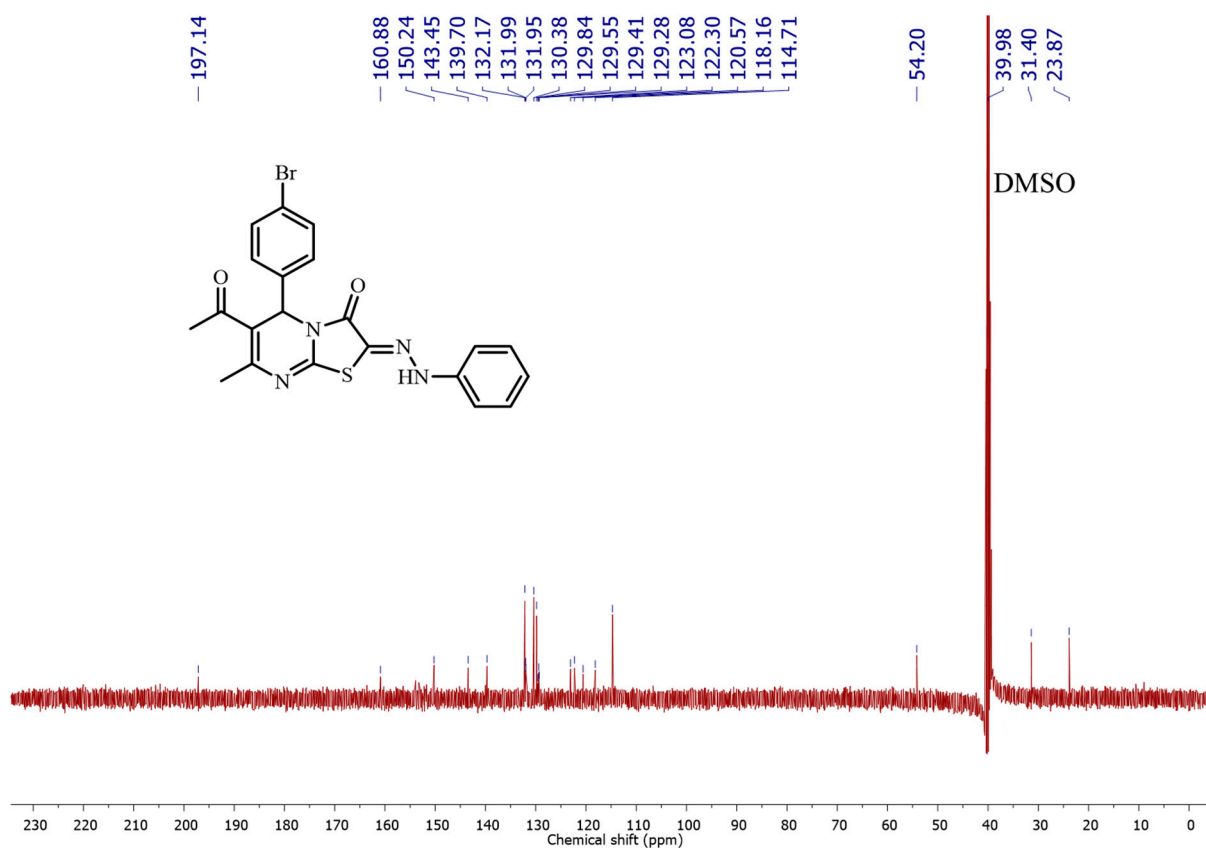

**Figure S10.** IR spectrum of compound **3b** (KBr tablet).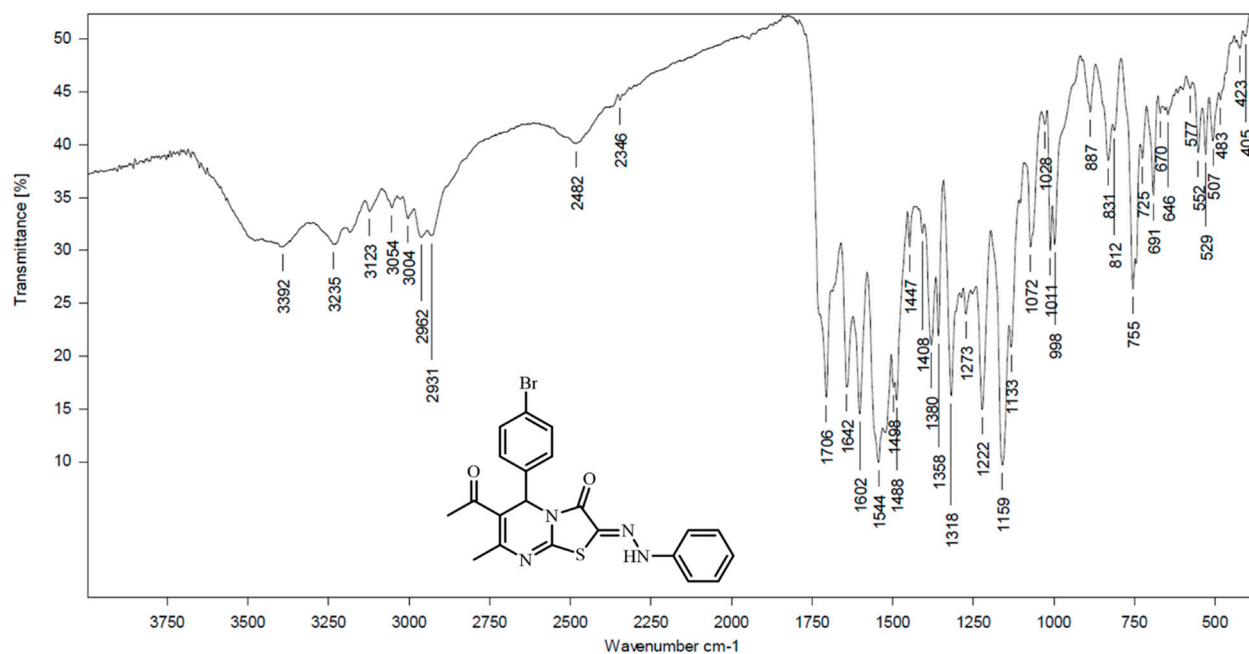**Figure S11.** ESI MS spectrum of compound **3b** (Ion Polarity: Positive).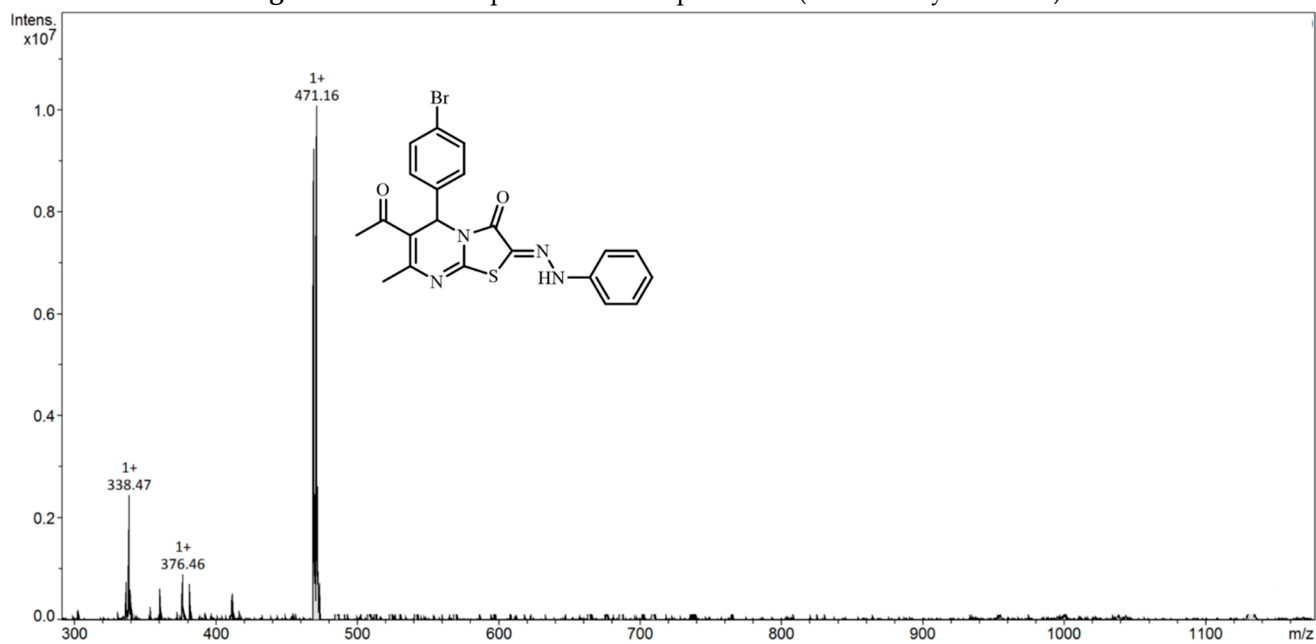**Figure S12.** <sup>1</sup>H NMR spectrum of compound **3c** (DMSO-d<sub>6</sub>, 400 MHz, 25°C).

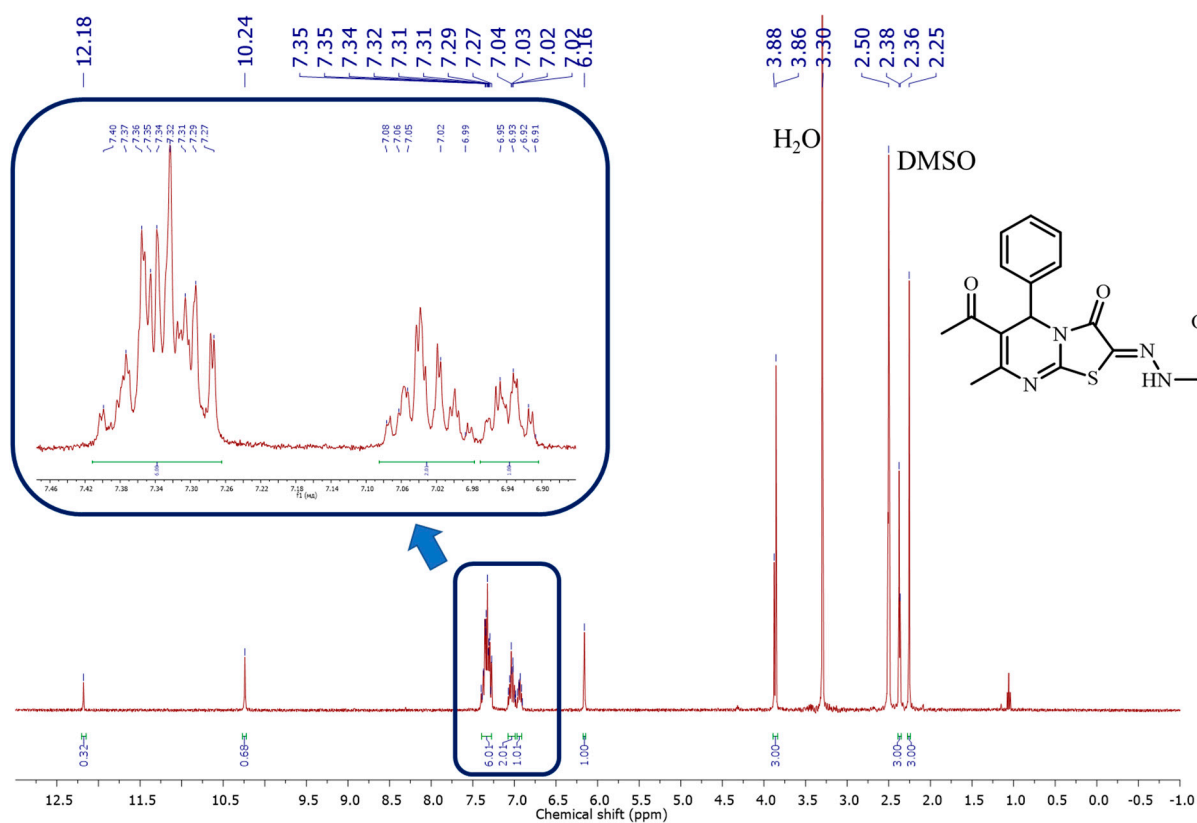

Figure S13. <sup>13</sup>C NMR spectrum of compound 3c (DMSO-d<sub>6</sub>, 100 MHz, 25°C).

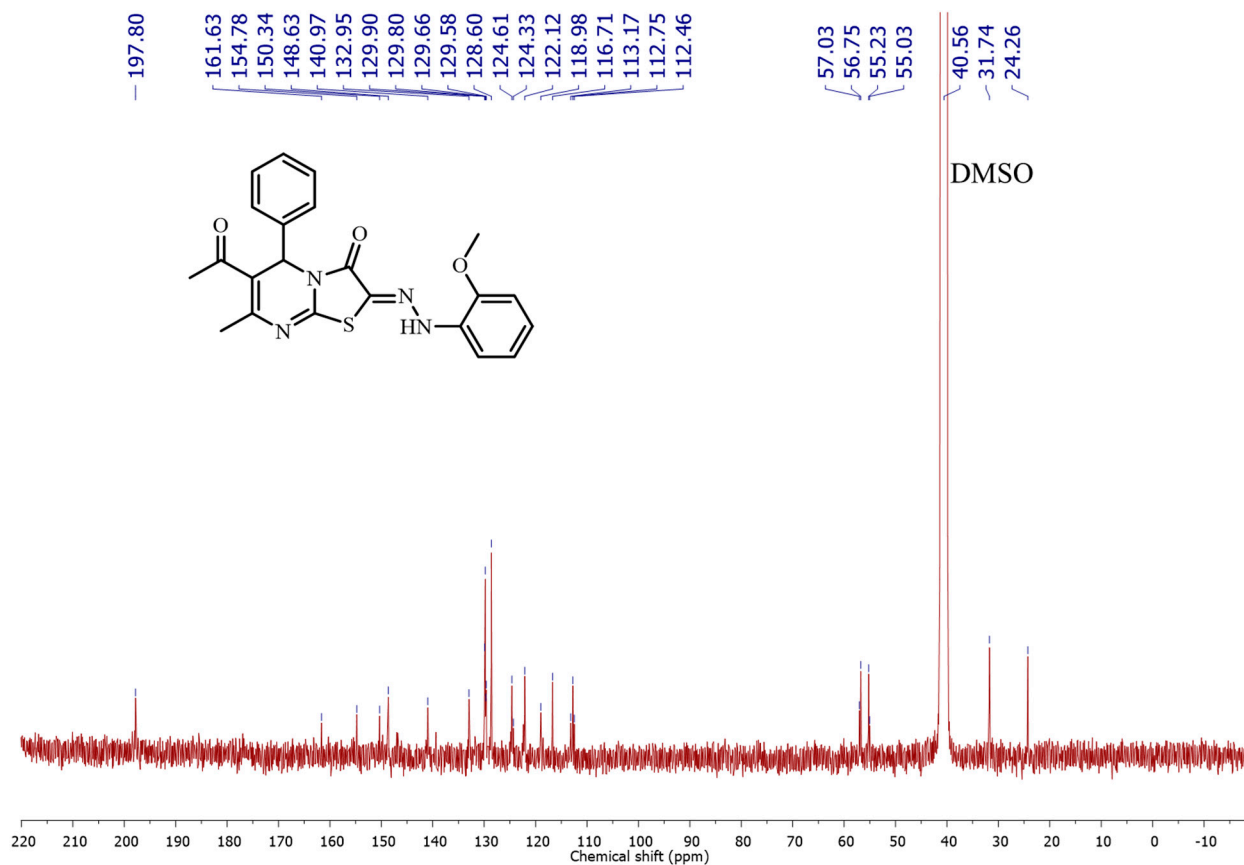

**Figure S14.** IR spectrum of compound **3c** (KBr tablet).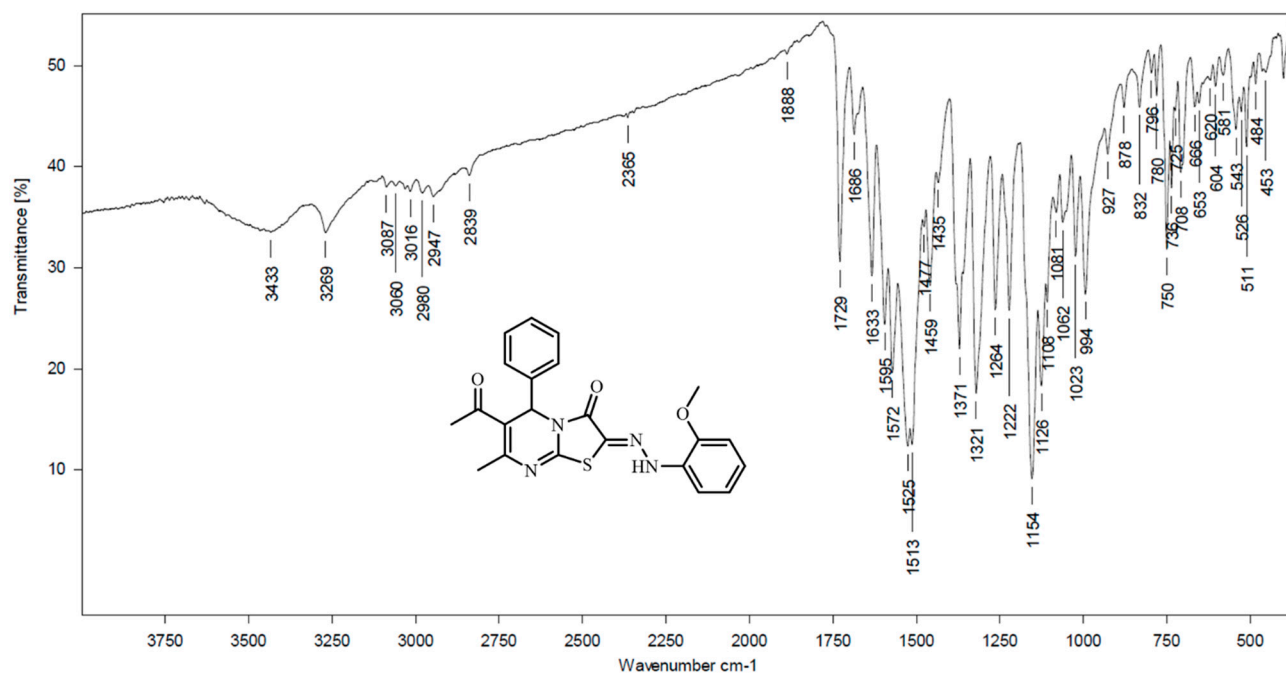**Figure S15.** ESI MS spectrum of compound **3c** (Ion Polarity: Positive).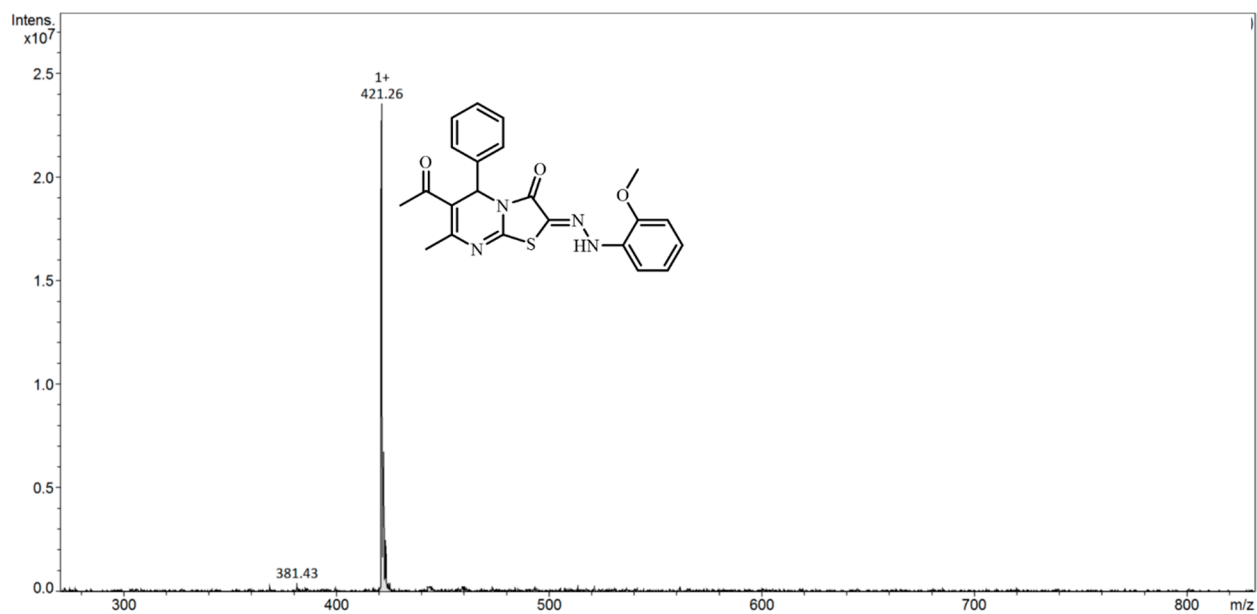**Figure S16.** <sup>1</sup>H NMR spectrum of compound **4a** (DMSO-d<sub>6</sub>, 400 MHz, 25°C).

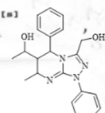

**Figure S18.**  $^{13}\text{C}$  NMR spectrum of compound **4a** (DMSO- $d_6$ , 100 MHz, 25°C).

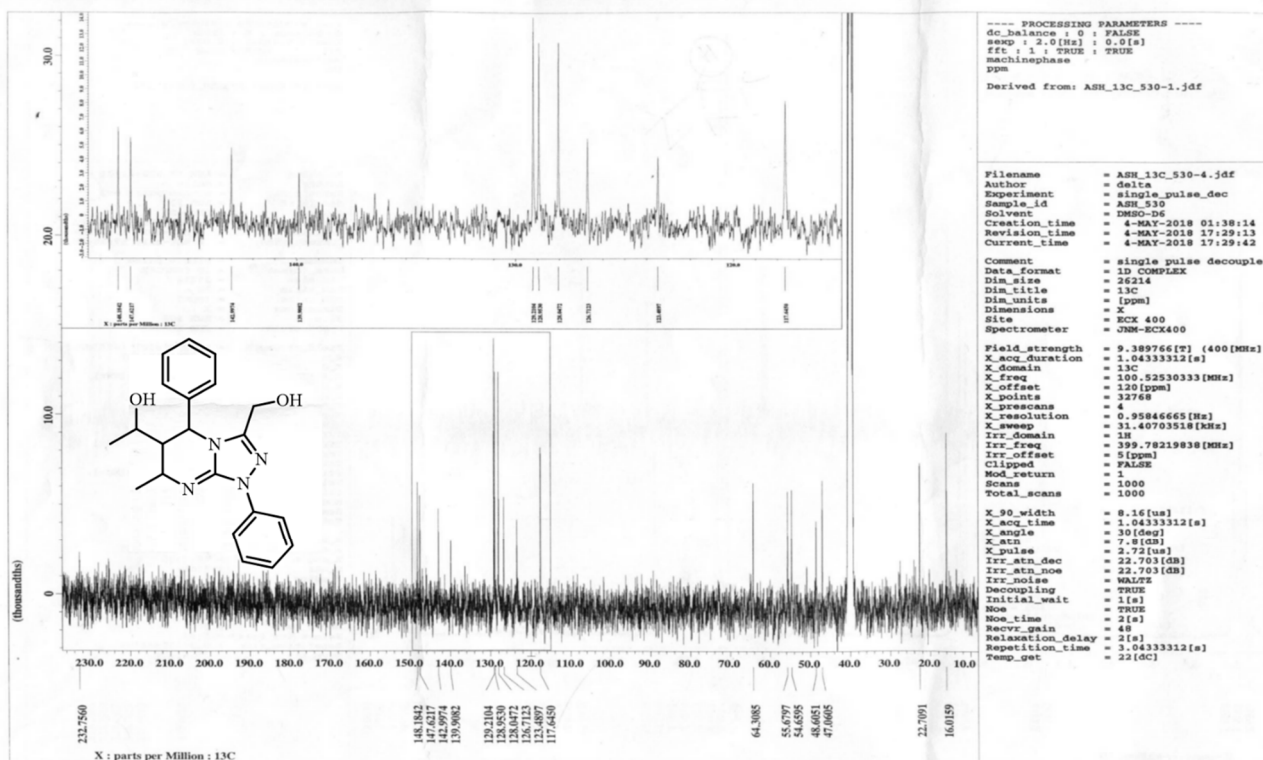

**Figure S18.** DEPT spectrum of compound **4a** (DMSO-d<sub>6</sub>, 100 MHz, 25°C).

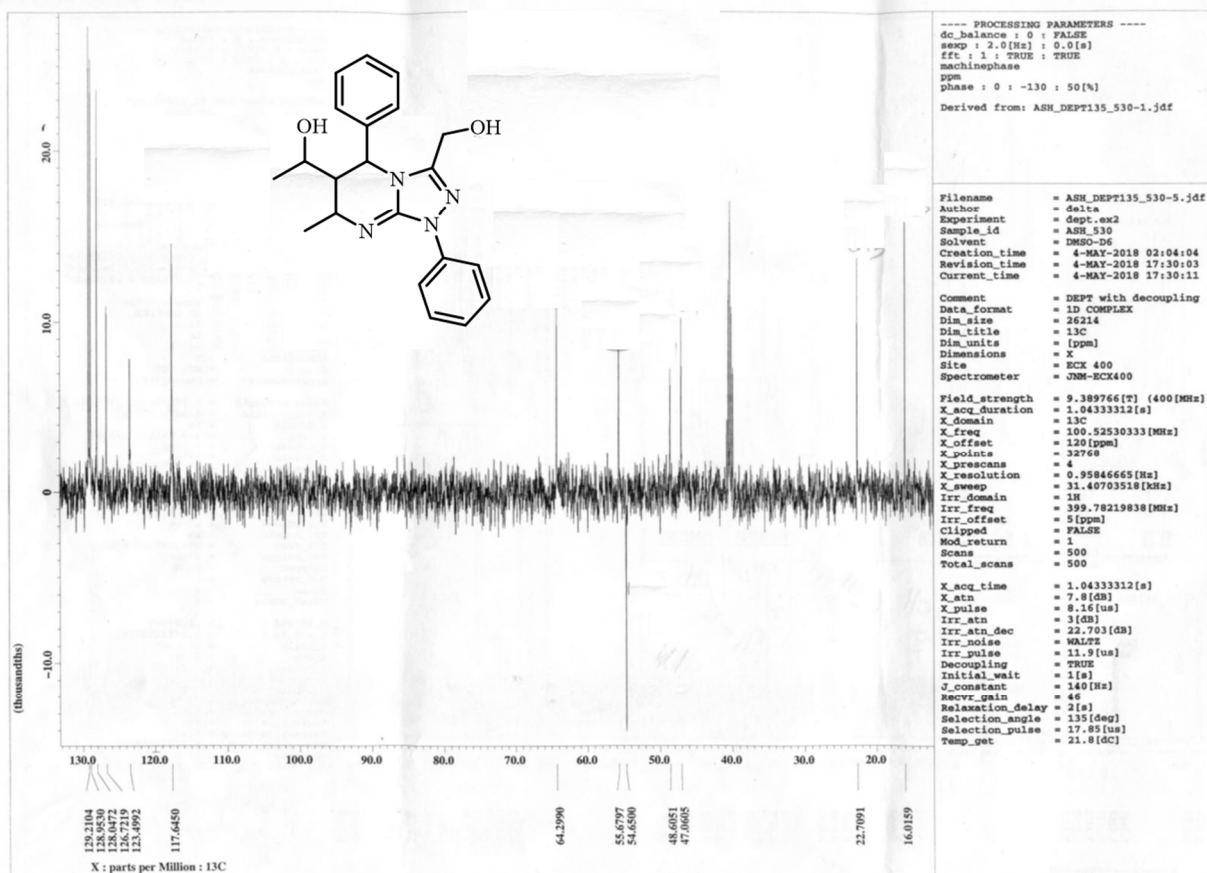

Supplement: s1 [file s1]
